# Supplementary material for: A Model Iron Gall Ink: An In-Depth Study of Ageing Processes Involving Gallic Acid
Source: MDPI journal article supplement (doi:10.3390/molecules27238603), 2022-12-06
Supplement: s1 [file s1]

## SUPPLEMENTARY MATERIALS for

# A model iron gall ink: an in-depth study of ageing processes involving gallic acid

Adele Ferretti<sup>1</sup>, Francesca Sabatini<sup>2</sup> and Iliaria Degano<sup>\*1</sup>

<sup>1</sup> Department of Chemistry and Industrial Chemistry, University of Pisa, Via G. Moruzzi 13, 56124, Pisa, (Italy);

<sup>2</sup> Institute of Chemical Science and Technologies "G. Natta" (CNR-SCITEC), Via Elce di Sotto 8, 01628, Perugia, (Italy);

\* Correspondence: [iliana.degano@unipi.it](mailto:iliana.degano@unipi.it)

- **Table S1:** Extraction yields obtained for gallic acid extract from model gallic acid inks mock-ups;
- **Table S2:** Molecular markers identified in the aged and unaged model gallic acid ink mock-ups;
- **Table S3:** Parameters used for artificial ageing tests;
- **Table S4:** Calibration curves parameters for gallic and ellagic acid in the HPLC-DAD system;
- **Figure S1:** Tandem mass spectrum of gallic acid;
- **Figure S2:** Tandem mass spectrum of ellagic acid;
- **Figure S3-S15:** Tandem mass spectra of m<sub>1</sub>-m<sub>14</sub> with hypothesised structures.

Table S.1: Extraction yields obtained for gallic acid extract from model gallic acid inks mock-ups.

| Extraction methods                                                                                             | Extraction yields (mg of dye/g of sample) |
|----------------------------------------------------------------------------------------------------------------|-------------------------------------------|
| EDTA-DMF (0.1% of EDTA in H <sub>2</sub> O/DMF 1:1)                                                            | 12.9                                      |
| DMSO                                                                                                           | 0.9                                       |
| Oxalic acid solution (C <sub>2</sub> H <sub>2</sub> O <sub>4</sub> /MeOH/acetone/H <sub>2</sub> O, 1:30:30:40) | 0.5                                       |
| Formic acid solution (HCOOH/MeOH, 1:19)                                                                        | 0.4                                       |
| Methanolysis (HCl/MeOH 1:30) redissolved in DMSO                                                               | 0.4                                       |
| Methanolysis (HCl/MeOH 1:30) redissolved in MeOH                                                               | 1.0                                       |
| Methanolysis (HCl/MeOH 1:30) redissolved in DMF                                                                | 0.1                                       |
| Methanolysis (HCl/MeOH 1:30) redissolved in H <sub>2</sub> O/ACN (1:1)                                         | 0.7                                       |
| Methanolysis (HCl/MeOH 1:30) redissolved in H <sub>2</sub> O/MeOH (1:1)                                        | 1.8                                       |

Table S.2: Molecular markers identified in the aged and unaged model gallic acid ink mock-ups. The markers detected at trace levels are indicated as (tr).

| <b>Compound</b>        | <b>t<sub>0</sub></b> | <b>LN 6M</b> | <b>LN 12M</b> | <b>Dark 12M</b> | <b>SB RH 30%</b> | <b>Dark + SB RH 50%</b> |
|------------------------|----------------------|--------------|---------------|-----------------|------------------|-------------------------|
| <b>Gallic acid</b>     | x                    | x            | x             | x               | x                | x                       |
| Marker 1               |                      | x            | x             | tr              | x                | x                       |
| Marker 2               |                      | x            | x             | tr              | x                | x                       |
| Marker 3               |                      | x            | x             | tr              | x                | x                       |
| Marker 4               |                      | x            | x             |                 | x                |                         |
| Marker 5               |                      | x            | x             | x               | x                | x                       |
| Marker 6               |                      | x            | x             | x               | x                | x                       |
| Marker 7               |                      | x            | x             | x               | x                | x                       |
| Marker 8               |                      | x            | x             | x               | x                | x                       |
| <b>m-digallic acid</b> |                      |              |               |                 | x                |                         |
| <b>p-digallic acid</b> |                      |              |               |                 | x                |                         |
| Marker 9               |                      |              |               | x               |                  | x                       |
| Marker 10              |                      | x            | x             |                 | x                | x                       |
| Marker 11              |                      | x            | x             | x               | x                | x                       |
| Marker 12              |                      |              |               | x               |                  | x                       |
| <b>Ellagic acid</b>    | x                    | x            | x             | x               | x                | x                       |
| Marker 13              |                      |              |               | x               |                  | x                       |
| Marker 14              |                      |              |               | x               |                  | x                       |

Table S.3: Parameters used for artificial ageing tests.

|        | <b>Irradiance (W/m<sup>2</sup>)</b> | <b>Temperature (°C)</b> | <b>Relative humidity (%)</b> | <b>Time (weeks)</b> |
|--------|-------------------------------------|-------------------------|------------------------------|---------------------|
| Test 1 | 1000                                | 40                      | 30                           | 4                   |
| Test 2 | 550                                 | 40                      | 50                           | 8                   |

Table S.4: Calibration curves coefficients for gallic and ellagic acid in the HPLC-DAD system.

| <b>Analyte</b> | <b>m (Area)</b>   | <b>q (Area/mg)</b> | <b>R<sup>2</sup></b> |
|----------------|-------------------|--------------------|----------------------|
| Gallic acid    | $7.6 \times 10^4$ | $-3.1 \times 10^4$ | 0.999                |
| Ellagic acid   | $5.5 \times 10^4$ | $-1.0 \times 10^5$ | 0.993                |

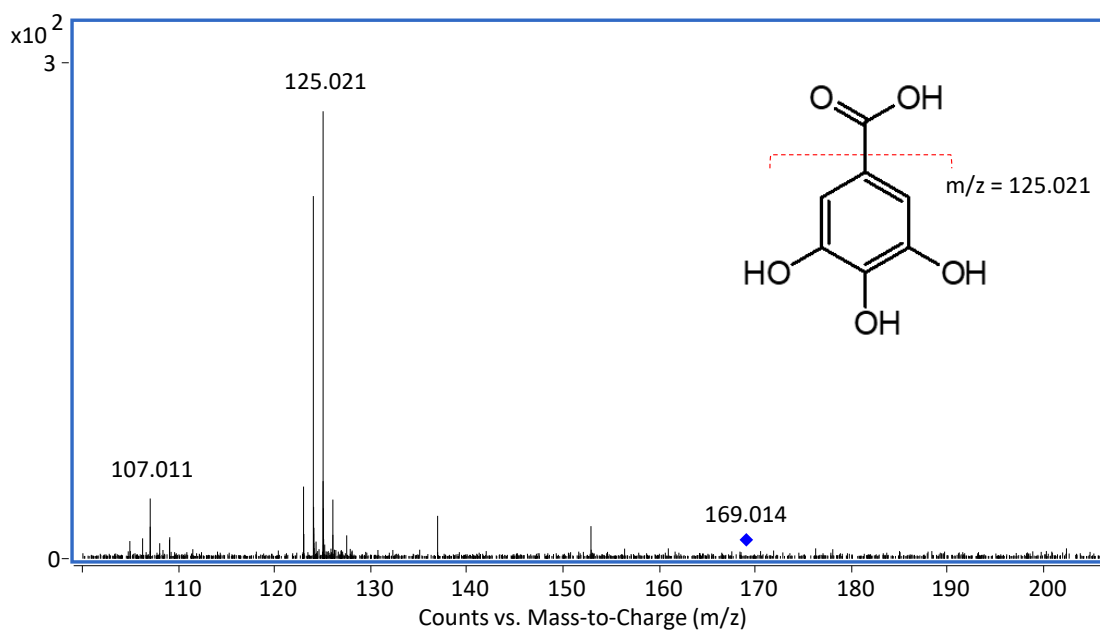

Figure S.1: Tandem mass spectrum of gallic acid ( $t_R = 2.8$  min,  $C_7H_6O_5$ )

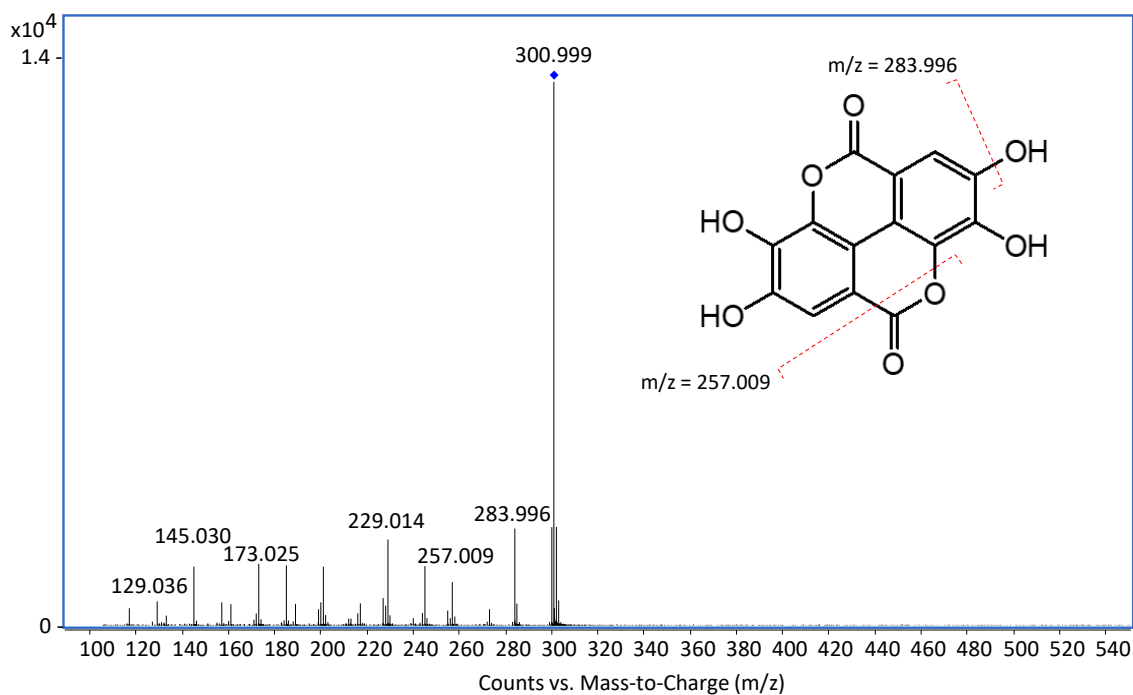

Figure S.2: Tandem mass spectrum of ellagic acid ( $t_R = 11.8$  min,  $C_{14}H_8O_6$ )

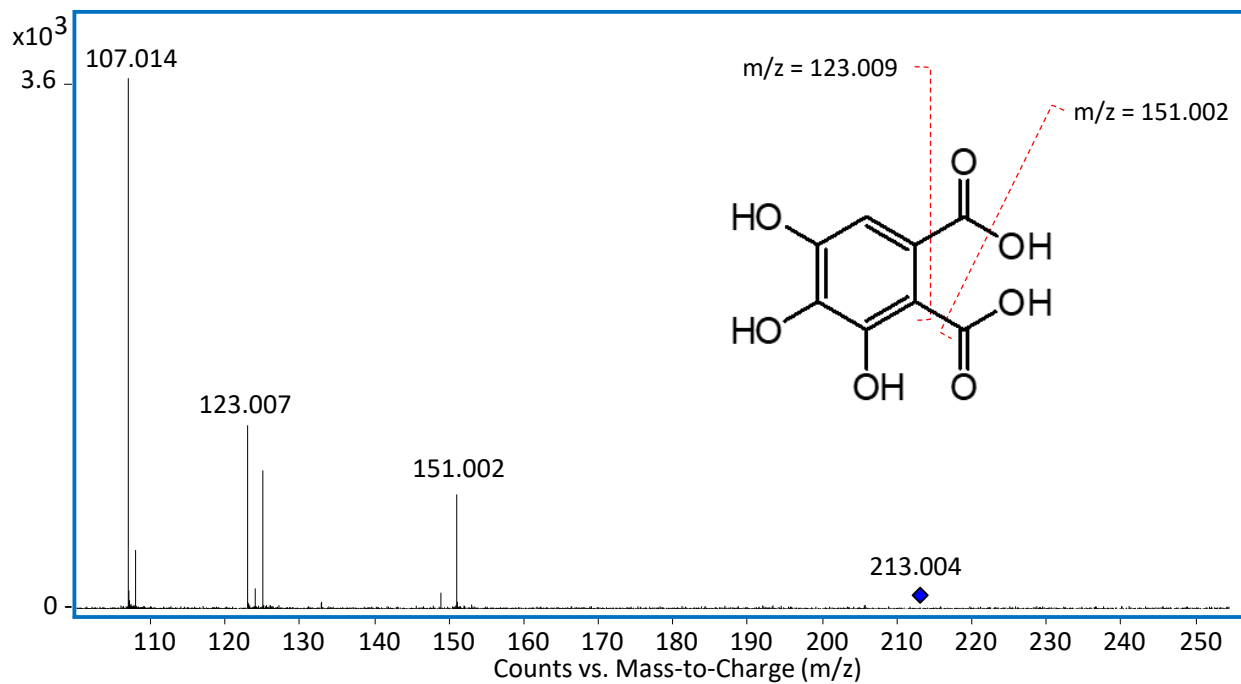

Figure S.3: Tandem mass spectrum of  $m_1$  ( $t_R = 2.9$  min,  $C_8H_6O_7$ ) with hypothesized structure

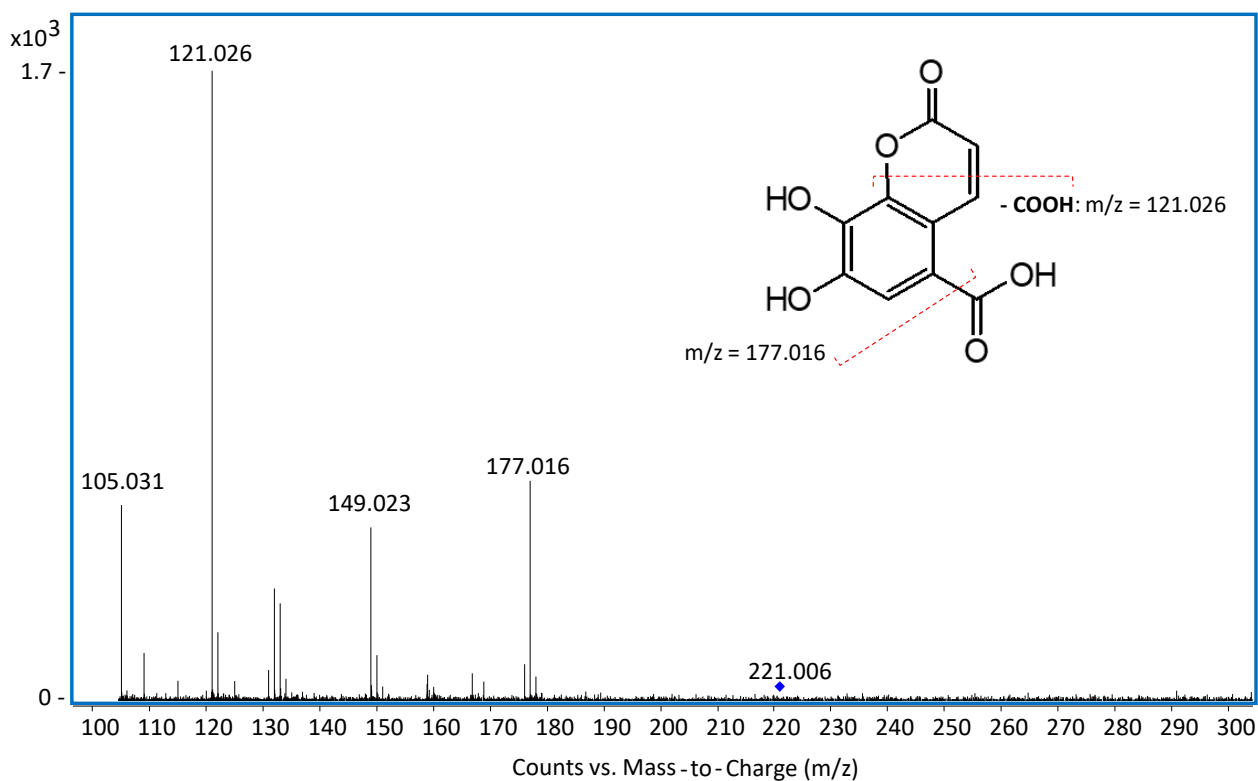

Figure S.4: Tandem mass spectrum of  $m_2$  ( $t_R = 3.9$  min,  $C_{10}H_6O_6$ ) with hypothesized structure

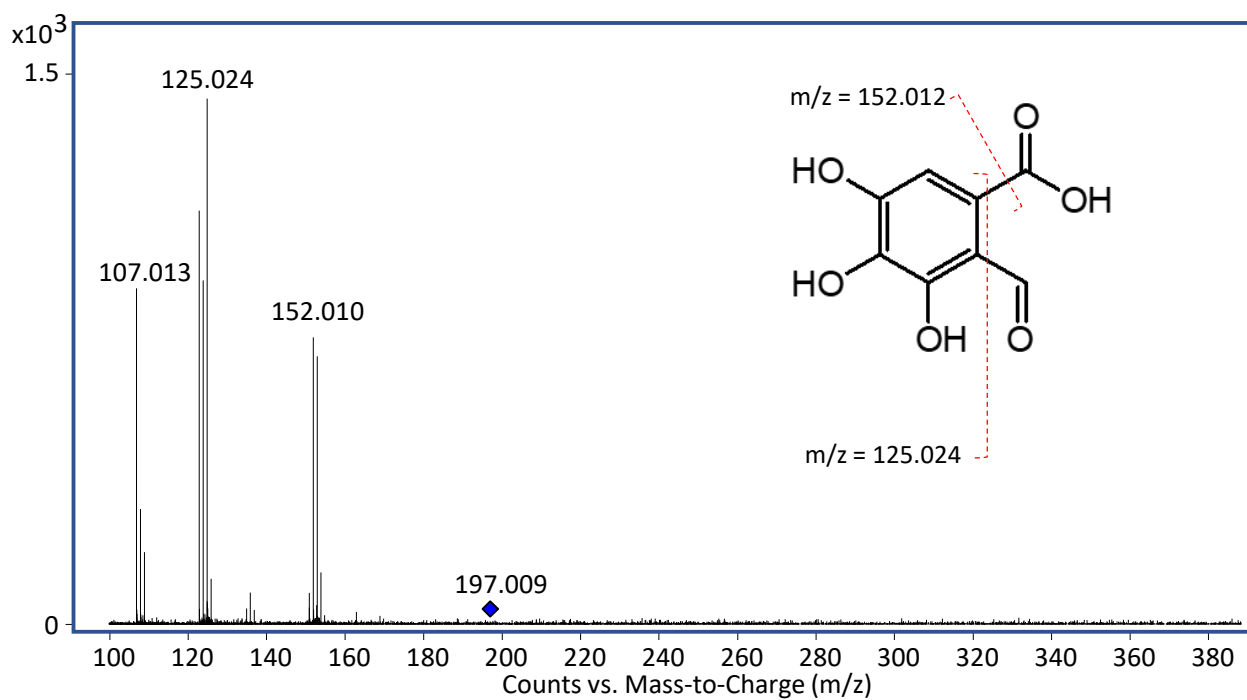

Figure S.5: Tandem mass spectrum of  $m_3$  ( $t_R = 4.4$  min,  $C_8H_6O_6$ ) with hypothesized structure

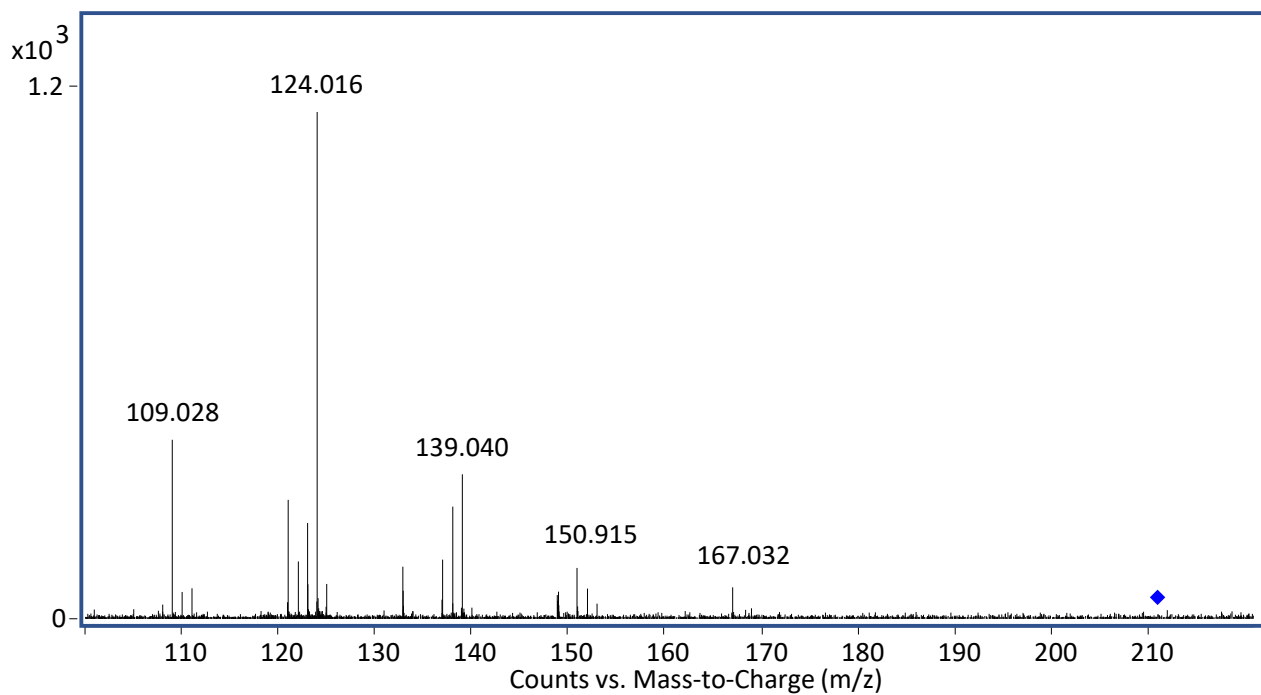

Figure S.6: Tandem mass spectrum of  $m_4$  ( $t_R = 4.6$  min,  $C_9H_8O_6$ )

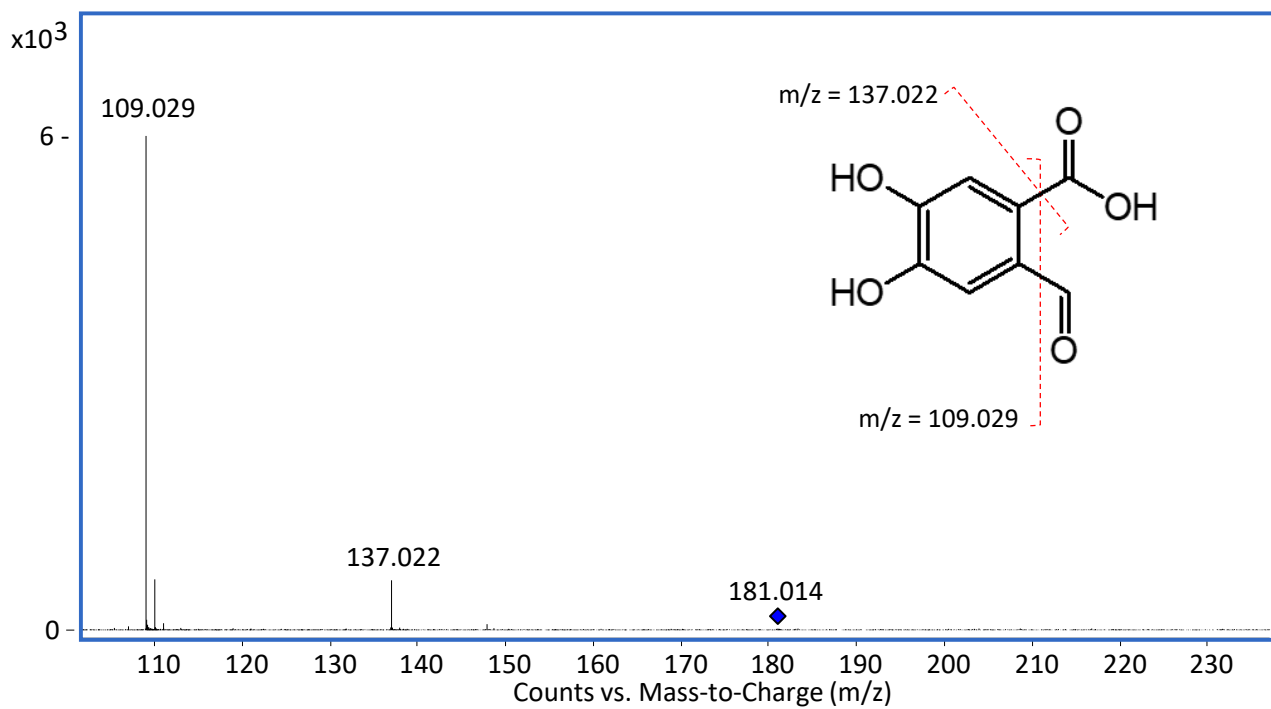

Figure S.7: Tandem mass spectrum of  $m_5$  ( $t_R = 6.2$  min,  $C_8H_6O_5$ ) with hypothesized structure

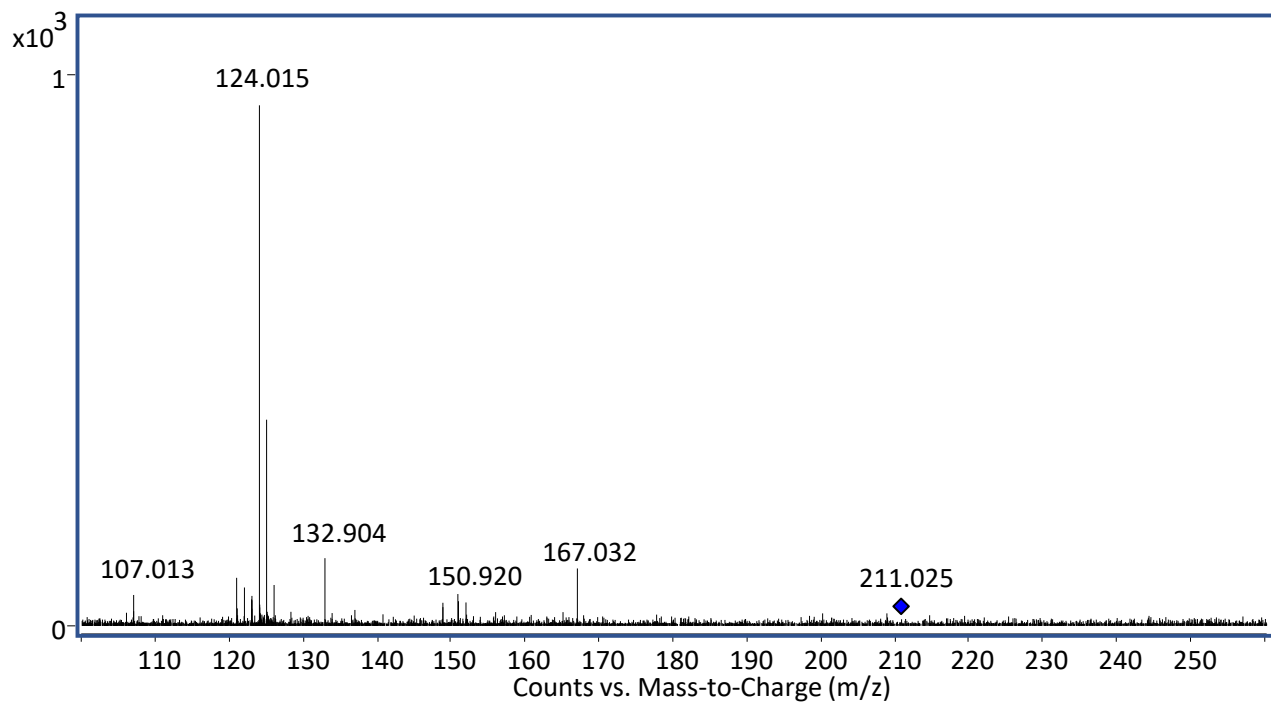

Figure S.8: Tandem mass spectrum of  $m_6$  ( $t_R = 7.3$  min,  $C_9H_8O_6$ )



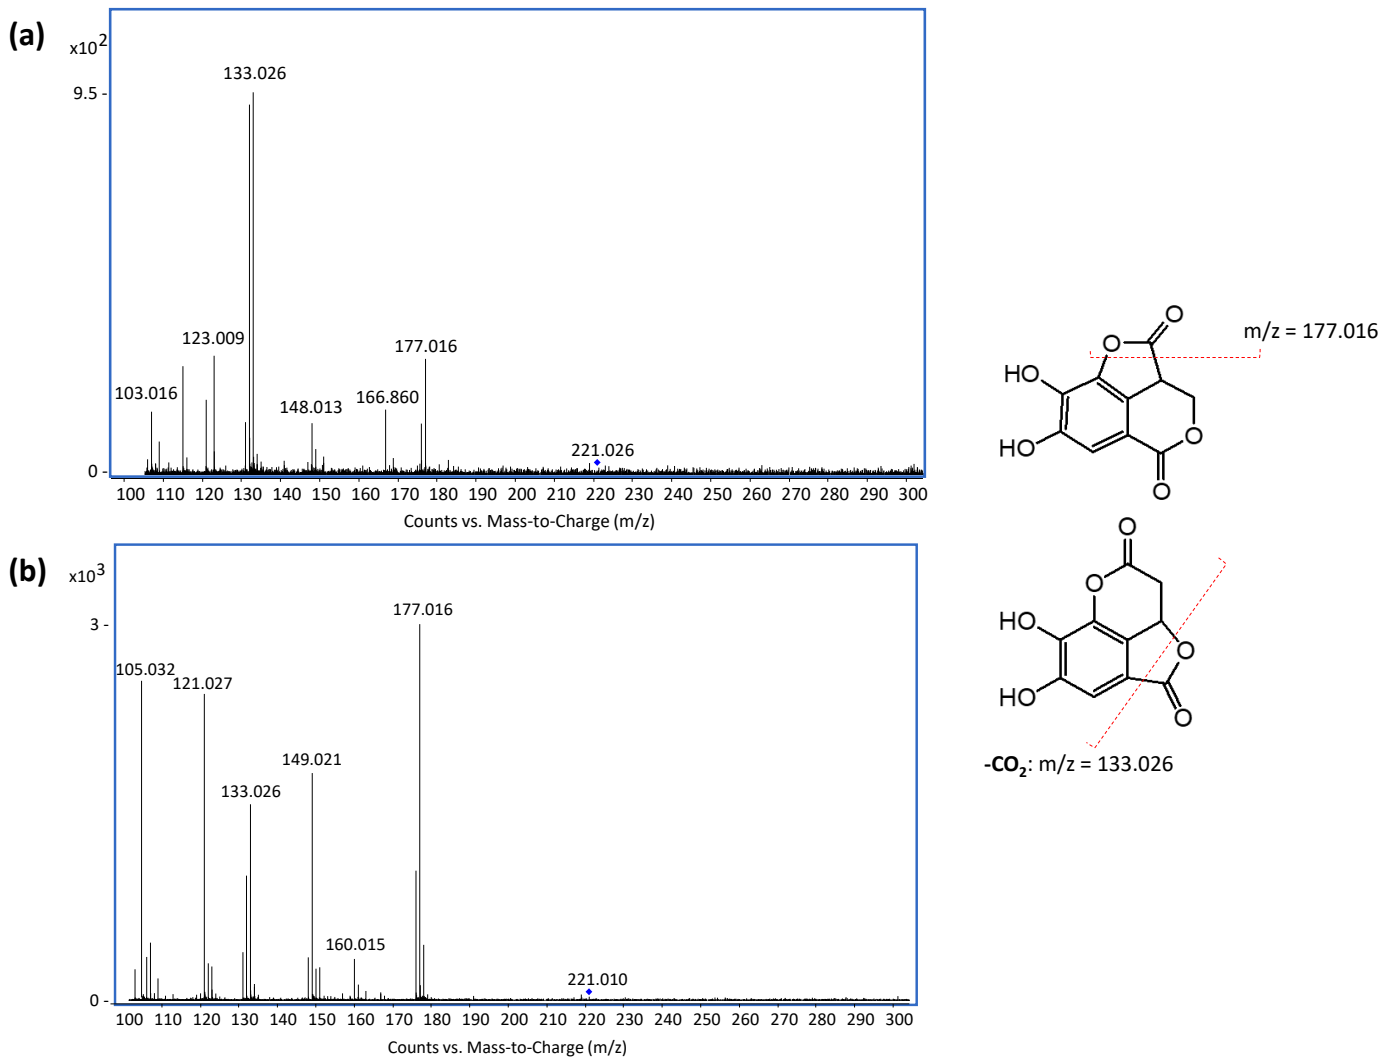

Figure S.9: Tandem mass spectrum of  $m_7$  (spectrum a,  $t_R = 8.2$  min,  $C_9H_8O_5$ ) and  $m_8$  (spectrum b,  $t_R = 8.9$  min,  $C_9H_8O_5$ ) with hypothesised structures

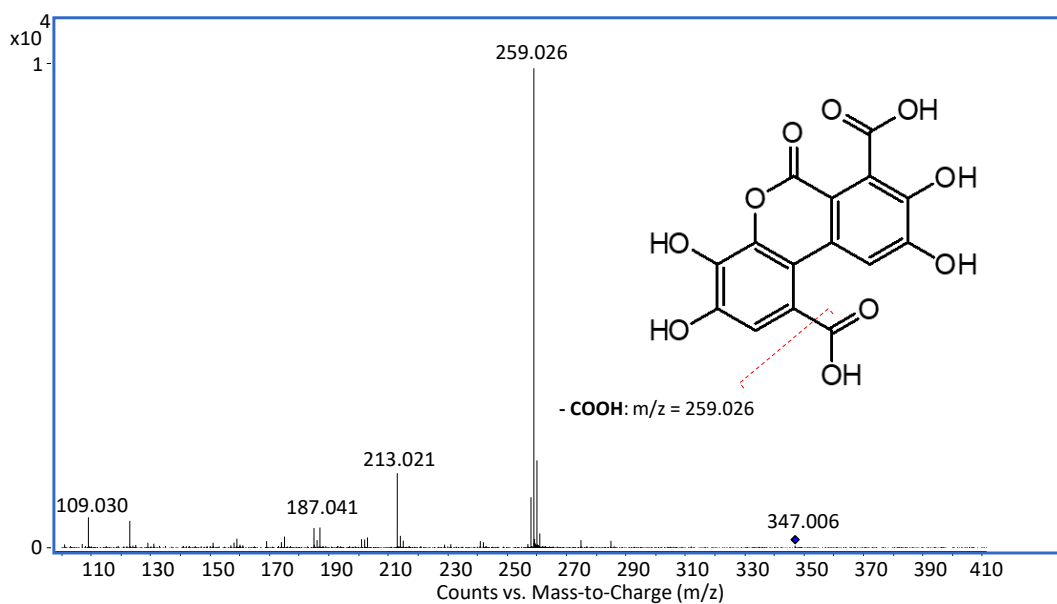

Figure S.10: Tandem mass spectra of  $m_9$  ( $t_R = 9.5$  min,  $C_{15}H_8O_{10}$ ) with hypothesised structure

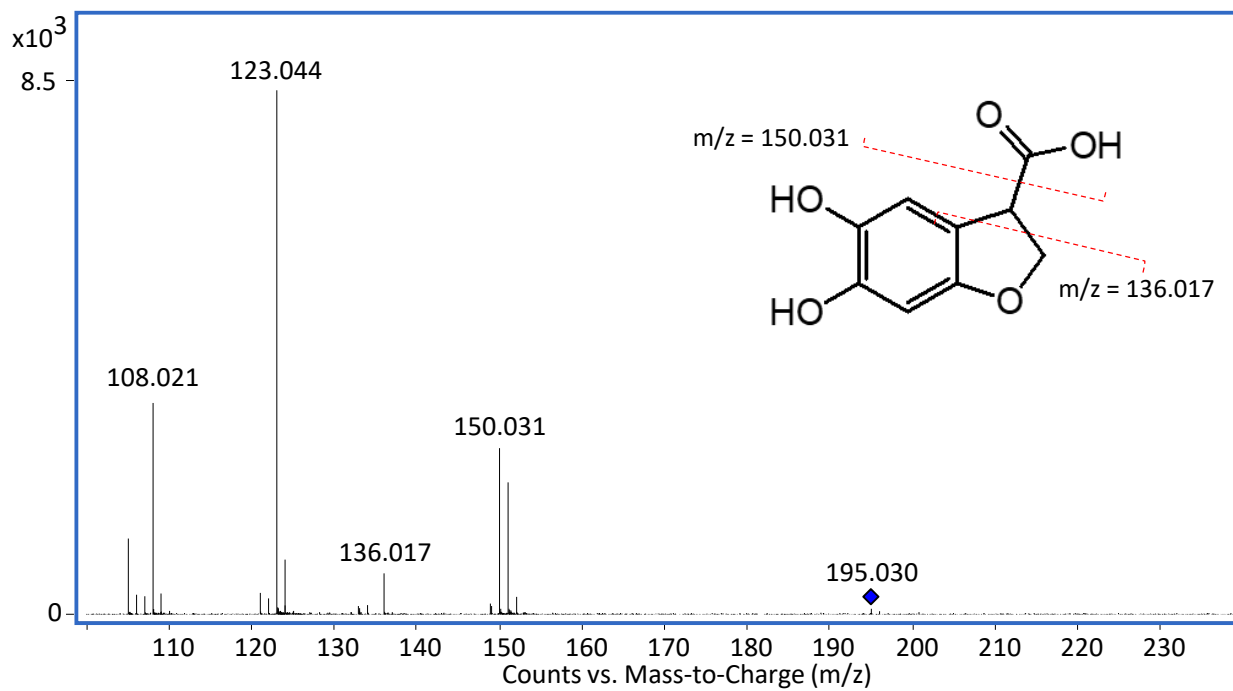

Figure S.11: Tandem mass spectrum of  $m_{10}$  ( $t_R = 9.7$  min,  $C_9H_8O_5$ ) with hypothesized structure

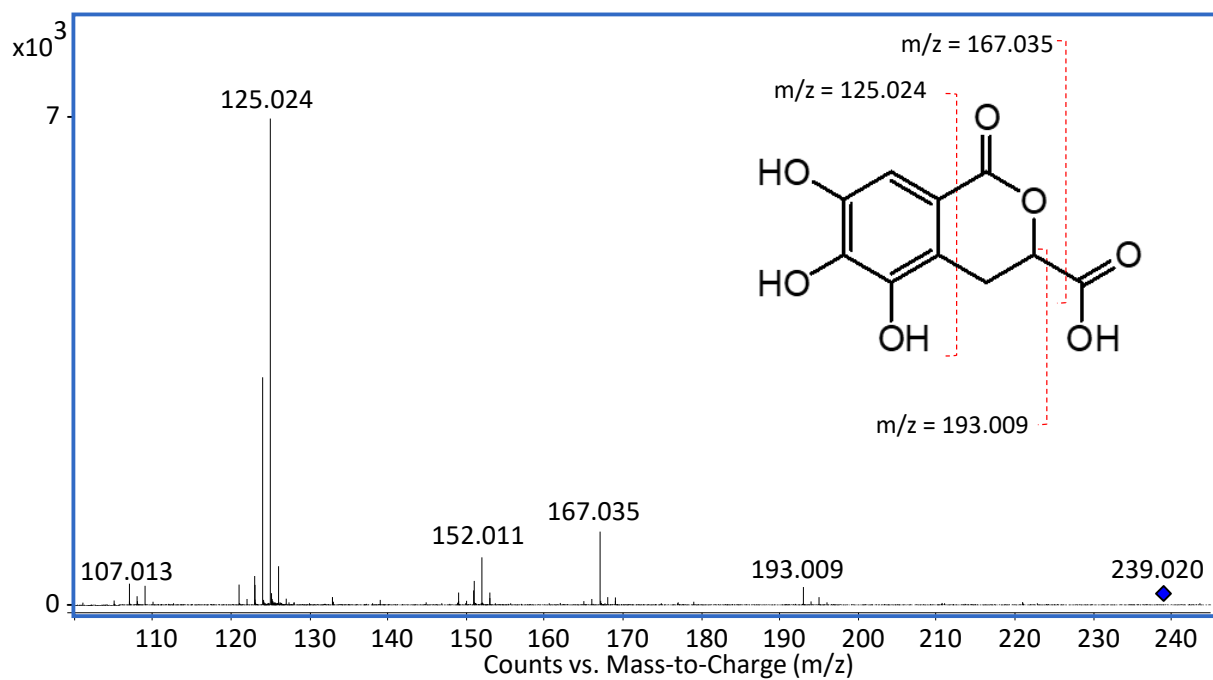

Figure S.12: Tandem mass spectrum of  $m_{11}$  ( $t_R = 9.9$  min,  $C_{10}H_8O_7$ ) with hypothesized structure

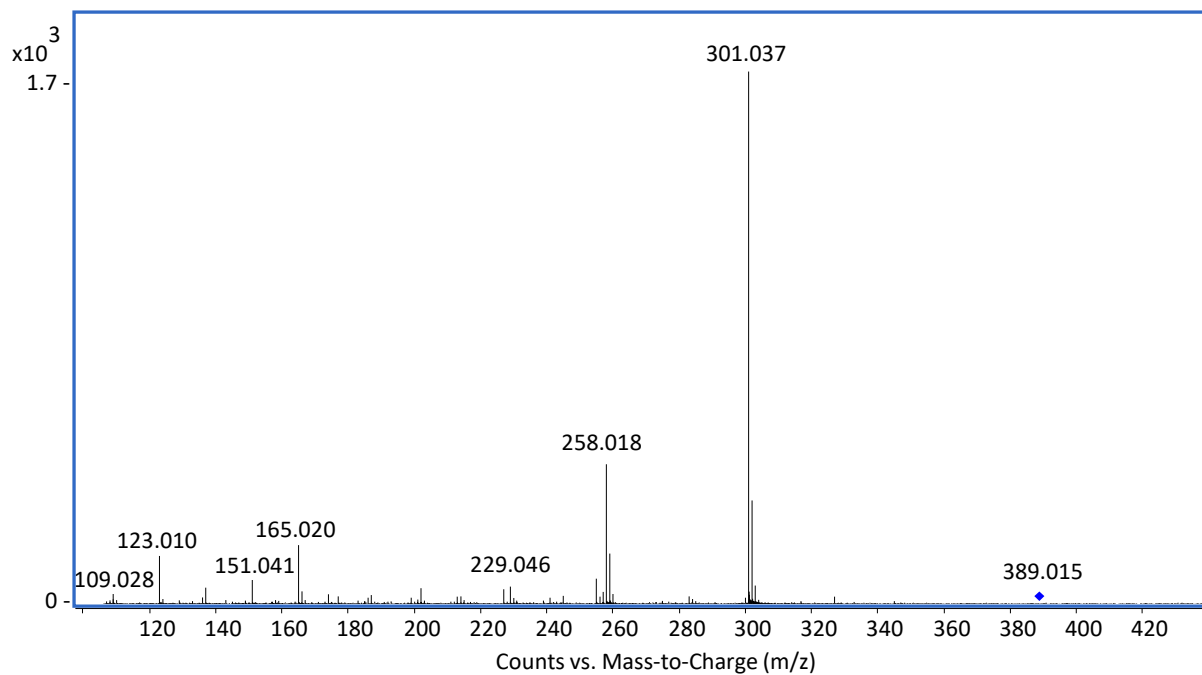

Figure S.13: Tandem mass spectrum of  $m_{12}$  ( $t_R = 10.5$  min,  $C_{17}H_{10}O_{11}$ ) with hypothesised structure

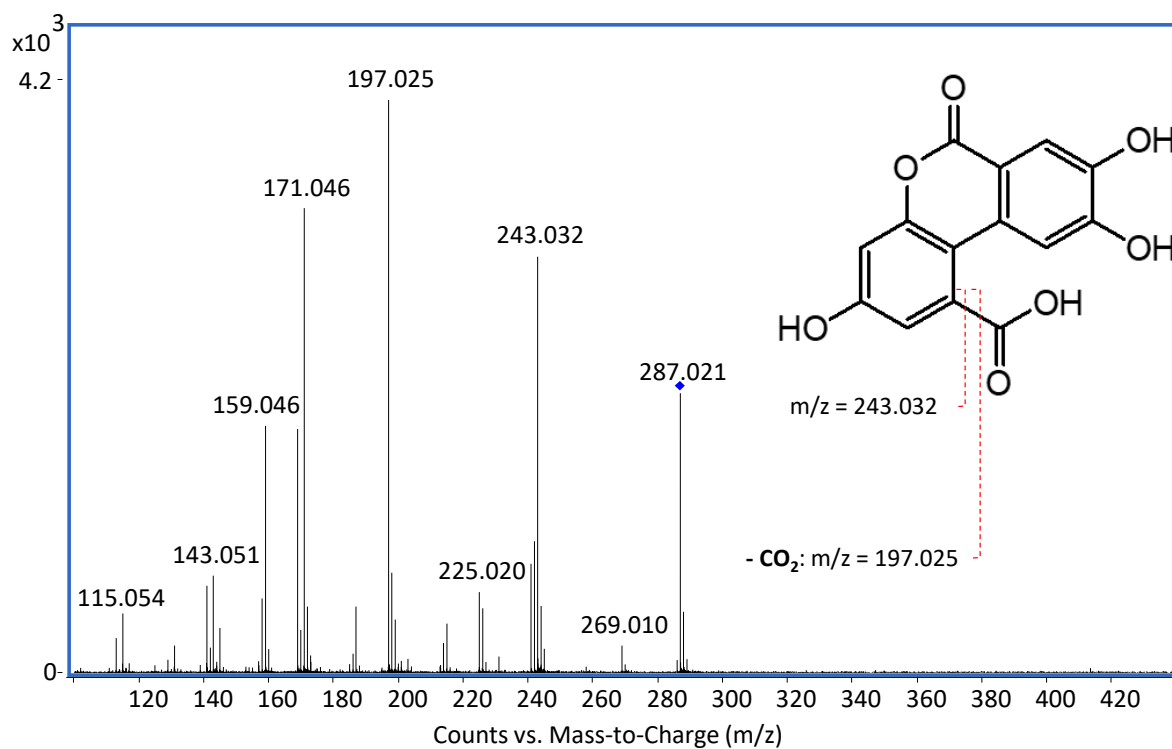

Figure S.14: Tandem mass spectrum of  $m_{13}$  ( $t_R = 12.3$  min,  $C_{14}H_8O_7$ ) with hypothesised structure

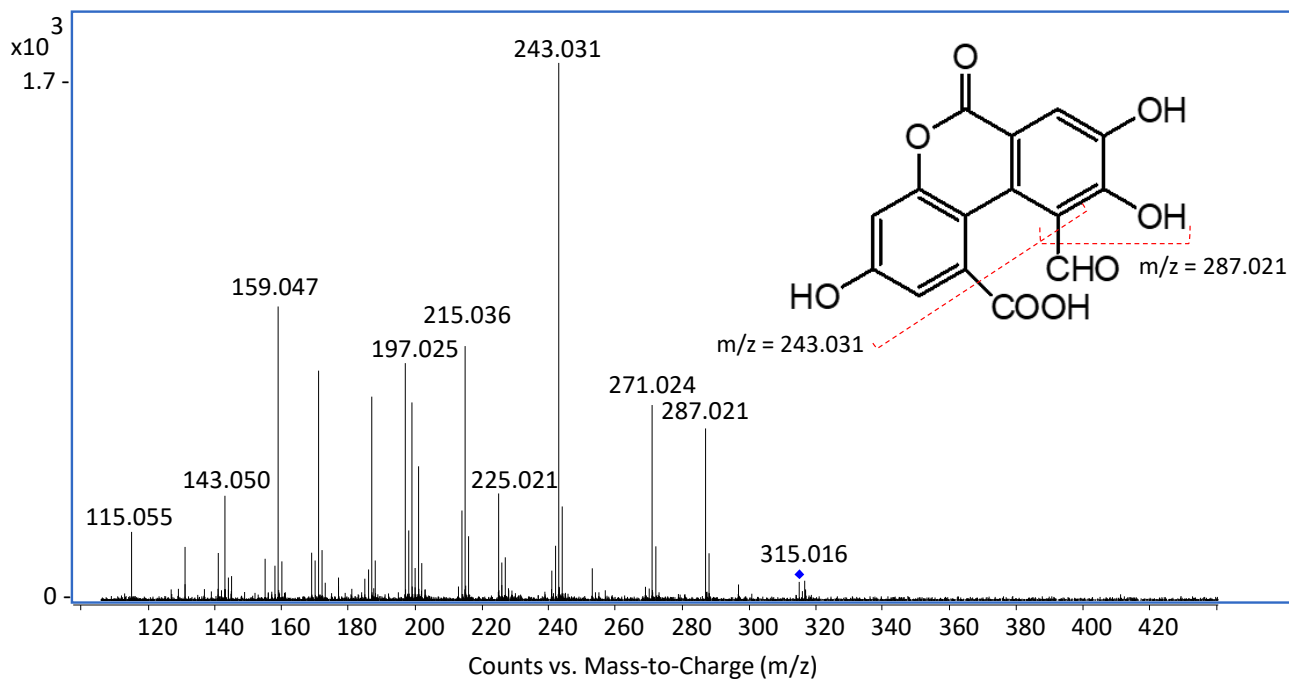

Figure S.15: Tandem mass spectrum of  $m_{14}$  ( $t_R = 13.2$  min,  $C_{15}H_8O_8$ ) with hypothesized structure
